# Supplementary material for: Age-specific association between blood pressure and vascular and non-vascular chronic diseases in 0·5 million adults in China: a prospective cohort study
Source: PubMed Central journal article supplement (PMC5960069; doi:10.1016/s2214-109x(18)30217-1), 2018-05-14
Supplement: mmc1.pdf [file mmc1.pdf]

# THE LANCET

## Global Health

### Supplementary appendix

This appendix formed part of the original submission and has been peer reviewed. We post it as supplied by the authors.

Supplement to: Lacey B, Lewington S, Clarke R, et al. Age-specific association between blood pressure and vascular and non-vascular chronic diseases in 0.5 million adults in China: a prospective cohort study. *Lancet Glob Health* 2018; **6**: e641–49.

*This page intentionally left blank*

# Age-specific relation of blood pressure to vascular and non-vascular chronic diseases in China: a prospective study of 0.5 million adults

## Supplementary Appendix, Table of Contents

|                                                                                                                                                                                                                                         | Page |
|-----------------------------------------------------------------------------------------------------------------------------------------------------------------------------------------------------------------------------------------|------|
| <b>Table S1:</b> Chronic disease endpoints and ICD-10 codes                                                                                                                                                                             | 3    |
| <b>Table S2:</b> Number of incident vascular and non-vascular chronic disease events included in main analyses, by age at risk and sex                                                                                                  | 4    |
| <b>Table S3:</b> Number of participants and their mean age and blood pressure at baseline, by baseline age and sex                                                                                                                      | 5    |
| <b>Table S4:</b> Regression dilution ratios for blood pressure, by age- and sex-specific baseline groups (among 15 853 participants resurveyed)                                                                                         | 6    |
| <b>Table S5:</b> Estimated usual blood pressure, by age at baseline and sex                                                                                                                                                             | 7    |
| <b>Table S6:</b> Incidence of ischaemic heart disease, ischaemic stroke and intracerebral haemorrhage versus usual SBP, by age at risk and sex                                                                                          | 8    |
| <b>Figure S1:</b> Incidence of vascular and non-vascular chronic disease versus usual SBP                                                                                                                                               | 9    |
| <b>Figure S2:</b> Mortality from vascular and non-vascular chronic disease: hazard ratio for 10 mmHg higher usual SBP                                                                                                                   | 10   |
| <b>Figure S3:</b> Vascular deaths attributable to elevated SBP in China, 2015                                                                                                                                                           | 11   |
| <b>Table S7:</b> Incidence of vascular and non-vascular chronic disease: hazard ratios for 10 mmHg higher usual SBP, progressively adjusted for potential confounders                                                                   | 12   |
| <b>Table S8:</b> Incidence of vascular and non-vascular chronic disease: hazard ratios for 10 mmHg higher usual SBP in urban and rural areas                                                                                            | 13   |
| <b>Table S9:</b> Incidence of vascular and non-vascular chronic disease: hazard ratios for 10 mmHg higher usual SBP, excluding the first 3 years of follow-up and excluding those taking blood pressure-lowering medication at baseline | 14   |
| <b>Table S10:</b> Incidence of chronic kidney disease and diabetes versus usual SBP, by age at risk and sex                                                                                                                             | 15   |
| <b>Table S11:</b> Incidence of chronic kidney disease and cancer versus usual SBP, by disease subtype                                                                                                                                   | 16   |
| <b>Figure S4:</b> Incidence of ischaemic heart disease, ischaemic stroke and intracerebral haemorrhage versus usual DBP                                                                                                                 | 17   |
| <b>Table S12:</b> Incidence of ischaemic heart disease, ischaemic stroke and intracerebral haemorrhage versus usual DBP, by age at risk and sex                                                                                         | 18   |
| <b>Figure S5:</b> Incidence of vascular and non-vascular chronic disease: hazard ratio for 5 mmHg higher usual DBP                                                                                                                      | 19   |
| <b>Figure S6:</b> Incidence of vascular and non-vascular chronic disease versus usual DBP                                                                                                                                               | 20   |
| <b>China Kadoorie Biobank collaborative group</b>                                                                                                                                                                                       | 21   |

**Table S1: Chronic disease endpoints and ICD-10 codes**

| Endpoint name                             | ICD-10 codes*                                                   |
|-------------------------------------------|-----------------------------------------------------------------|
| <b>Major vascular disease<sup>†</sup></b> |                                                                 |
| Ischaemic heart disease <sup>‡</sup>      |                                                                 |
| Myocardial infarction                     | I21, I22, I23                                                   |
| Other ischaemic heart disease death       | I20, I24, I25                                                   |
| Stroke                                    |                                                                 |
| Ischaemic stroke                          | I63                                                             |
| Intracerebral haemorrhage                 | I61                                                             |
| Subarachnoid haemorrhage                  | I60                                                             |
| Unspecified stroke                        | I64                                                             |
| Other stroke event <sup>§</sup>           | -                                                               |
| Other vascular                            |                                                                 |
| Other vascular death                      | I00-I15, I26-I52, I62, I65-I99, R96                             |
| Other vascular event <sup>  </sup>        | -                                                               |
| <b>Non-vascular disease</b>               |                                                                 |
| Chronic kidney disease                    | E10.2, E11.2, E12.2, E13.2, E14.2, N03, N18, N26, N27, I12, I13 |
| Diabetes (type 2)                         | E11, E13, E14                                                   |
| Cancer                                    | C00-C97                                                         |
| Liver cirrhosis                           | K70, K73, K74                                                   |
| COPD                                      | J42-J44                                                         |

COPD=Chronic obstructive pulmonary disease.

\* Source of mortality and morbidity follow-up include: death certificate (underlying cause of death only) and non-fatal events from local chronic disease registries (for ischaemic heart disease, stroke, cancer and diabetes) and from national health insurance claims system.

† Major vascular disease defined as first myocardial infarction, first stroke or other vascular death.

‡ Ischaemic heart disease defined as first myocardial infarction or other ischaemic heart disease death.

§ Type of first stroke (ischaemic stroke, intracerebral haemorrhage or subarachnoid haemorrhage) could not be established.

|| Type of first major vascular disease event (ischaemic heart disease or stroke) could not be established.

**Table S2: Number of incident vascular and non-vascular chronic disease events included in main analyses,\* by age at risk and sex**

| Age at risk, years | Major vascular disease, n <sup>†</sup> |                  |                           |                             |                             |       | Non-vascular disease, n |                   |      |                        |                 |
|--------------------|----------------------------------------|------------------|---------------------------|-----------------------------|-----------------------------|-------|-------------------------|-------------------|------|------------------------|-----------------|
|                    | Ischaemic heart disease <sup>‡</sup>   | Ischaemic stroke | Intracerebral haemorrhage | Other or unspecified stroke | Other vascular <sup>§</sup> | All   | Cancer                  | Diabetes (type 2) | COPD | Chronic kidney disease | Liver cirrhosis |
| <b>Male</b>        |                                        |                  |                           |                             |                             |       |                         |                   |      |                        |                 |
| 40-49              | 192                                    | 941              | 297                       | 77                          | 34                          | 1541  | 846                     | 824               | 258  | 112                    | 193             |
| 50-59              | 487                                    | 3058             | 667                       | 172                         | 130                         | 4514  | 2513                    | 1436              | 704  | 183                    | 351             |
| 60-69              | 774                                    | 4475             | 1107                      | 207                         | 169                         | 6732  | 3759                    | 1516              | 1441 | 258                    | 287             |
| 70-79              | 1046                                   | 4757             | 1124                      | 220                         | 374                         | 7521  | 3382                    | 837               | 1669 | 264                    | 165             |
| All                | 2499                                   | 13231            | 3195                      | 676                         | 707                         | 20308 | 10500                   | 4613              | 4072 | 817                    | 996             |
| <b>Female</b>      |                                        |                  |                           |                             |                             |       |                         |                   |      |                        |                 |
| 40-49              | 98                                     | 1131             | 317                       | 94                          | 34                          | 1674  | 1838                    | 1069              | 451  | 194                    | 122             |
| 50-59              | 303                                    | 4277             | 736                       | 274                         | 87                          | 5677  | 3200                    | 2686              | 991  | 350                    | 264             |
| 60-69              | 609                                    | 5841             | 889                       | 297                         | 149                         | 7785  | 3274                    | 2602              | 1498 | 338                    | 222             |
| 70-79              | 941                                    | 4863             | 874                       | 231                         | 309                         | 7218  | 2232                    | 1271              | 1466 | 241                    | 136             |
| All                | 1951                                   | 16112            | 2816                      | 896                         | 579                         | 22354 | 10544                   | 7628              | 4406 | 1123                   | 744             |
| <b>Overall</b>     | 4450                                   | 29343            | 6011                      | 1572                        | 1286                        | 42662 | 21044                   | 12241             | 8478 | 1940                   | 1740            |

COPD=Chronic obstructive pulmonary disease.

\* Exclusions as in Table 1. For prospective analyses of each non-vascular disease, we further excluded participants with a prior diagnosis of the relevant disease at baseline (ie, for analyses of cancer, we further excluded participants with a diagnosis of cancer at baseline). Following these exclusions, there were 489,125 participants in the analyses for major vascular disease, 486,746 for cancer, 462,732 for diabetes, 454,411 for COPD, 482,322 for chronic kidney disease, and 483,269 for liver cirrhosis.

<sup>†</sup> First major vascular disease event only. Major vascular disease defined as first myocardial infarction, first stroke or other vascular death.

<sup>‡</sup> Ischaemic heart disease defined as first myocardial infarction or other coronary death.

<sup>§</sup> Other vascular endpoint includes: 187 hypertensive heart disease deaths, 111 rheumatic heart disease deaths, 108 pulmonary heart disease deaths, 132 cardiac arrest deaths, 103 sudden deaths of unknown cause, 48 heart failure deaths and 597 events of other vascular diseases.

**Table S3: Number of participants and their mean age and blood pressure at baseline, by baseline age and sex\***

| Age at baseline, years | Participants | Mean age, years | Mean (SD) blood pressure at baseline |             |
|------------------------|--------------|-----------------|--------------------------------------|-------------|
|                        |              |                 | SBP, mmHg                            | DBP, mmHg   |
| <b>Male</b>            |              |                 |                                      |             |
| 40-49                  | 58413        | 44              | 128.5 (17.2)                         | 79.6 (11.4) |
| 50-59                  | 60935        | 54              | 132.7 (19.9)                         | 80.2 (11.3) |
| 60-69                  | 37192        | 64              | 139.1 (22.1)                         | 79.0 (11.3) |
| 70-79                  | 14091        | 72              | 142.8 (22.3)                         | 77.1 (11.2) |
| All (40-79)            | 170631       | 55              | 133.5 (20.3)                         | 79.5 (11.3) |
| <b>Female</b>          |              |                 |                                      |             |
| 40-49                  | 92292        | 44              | 124.3 (18.7)                         | 76.5 (10.7) |
| 50-59                  | 89641        | 54              | 132.7 (21.8)                         | 78.4 (10.9) |
| 60-69                  | 45058        | 64              | 140.6 (23.1)                         | 77.3 (10.9) |
| 70-79                  | 14462        | 72              | 145.3 (23.7)                         | 75.6 (11.2) |
| All (40-79)            | 241453       | 53              | 131.7 (22.2)                         | 77.3 (10.9) |
| <b>Overall</b>         | 412084       | 54              | 132.5 (21.4)                         | 78.2 (11.1) |

\*Exclusions as in Table 1, with further exclusion of those outside the age range 40-79 years at baseline.

**Table S4: Regression dilution ratios for blood pressure, by age- and sex-specific baseline groups (among 15 853 participants resurveyed\*)**

| Age at baseline, years | Number of participants | Mean interval between baseline and resurvey measures, years | Regression dilution ratios <sup>†</sup> |                  |
|------------------------|------------------------|-------------------------------------------------------------|-----------------------------------------|------------------|
|                        |                        |                                                             | SBP                                     | DBP              |
| <b>Male</b>            |                        |                                                             |                                         |                  |
| 40-49                  | 2126                   | 2.5                                                         | 0.61 (0.58-0.65)                        | 0.62 (0.59-0.65) |
| 50-59                  | 2208                   | 2.6                                                         | 0.59 (0.56-0.62)                        | 0.56 (0.53-0.59) |
| 60-69                  | 1456                   | 2.6                                                         | 0.54 (0.51-0.57)                        | 0.57 (0.54-0.61) |
| 70-79                  | 470                    | 2.6                                                         | 0.52 (0.46-0.58)                        | 0.56 (0.49-0.62) |
| <b>Female</b>          |                        |                                                             |                                         |                  |
| 40-49                  | 3536                   | 2.6                                                         | 0.65 (0.62-0.67)                        | 0.63 (0.61-0.66) |
| 50-59                  | 3711                   | 2.6                                                         | 0.63 (0.61-0.65)                        | 0.60 (0.58-0.62) |
| 60-69                  | 1850                   | 2.7                                                         | 0.59 (0.56-0.62)                        | 0.59 (0.56-0.63) |
| 70-79                  | 496                    | 2.6                                                         | 0.57 (0.52-0.62)                        | 0.57 (0.51-0.63) |

\* Exclusions as in Table 1, with further exclusion of those outside the age range of 40-79 years at baseline, and those with missing or out of range SBP (<80 or ≥250 mmHg) or DBP (<40 or ≥150 mmHg) at resurvey.

† Calculated using Rosner's regression method.

**Table S5: Estimated usual blood pressure,\* by age at baseline and sex**

| Baseline blood pressure group | Usual blood pressure (mmHg), by sex and baseline age |       |       |       |        |       |       |       |
|-------------------------------|------------------------------------------------------|-------|-------|-------|--------|-------|-------|-------|
|                               | Male                                                 |       |       |       | Female |       |       |       |
|                               | 40-49                                                | 50-59 | 60-69 | 70-79 | 40-49  | 50-59 | 60-69 | 70-79 |
| <b>SBP, mmHg</b>              |                                                      |       |       |       |        |       |       |       |
| 80-125                        | 120.0                                                | 121.4 | 124.0 | 125.5 | 116.7  | 120.6 | 124.3 | 126.5 |
| 125-144                       | 131.3                                                | 133.4 | 136.2 | 138.0 | 129.5  | 133.4 | 136.9 | 139.0 |
| 145-164                       | 143.2                                                | 145.2 | 147.9 | 149.5 | 141.7  | 145.3 | 148.7 | 150.7 |
| 165-184                       | 155.3                                                | 157.0 | 159.8 | 161.2 | 153.8  | 157.2 | 160.5 | 162.3 |
| 185-249                       | 170.2                                                | 172.2 | 174.9 | 176.0 | 169.7  | 172.8 | 175.3 | 177.3 |
| Overall                       | 128.5                                                | 132.7 | 139.1 | 142.8 | 124.3  | 132.7 | 140.6 | 145.3 |
| <b>DBP, mmHg</b>              |                                                      |       |       |       |        |       |       |       |
| 40-75                         | 72.6                                                 | 73.6  | 72.7  | 71.6  | 70.9   | 72.2  | 71.5  | 70.5  |
| 75-84                         | 79.7                                                 | 79.9  | 79.3  | 78.4  | 78.3   | 79.1  | 78.7  | 77.8  |
| 85-94                         | 85.4                                                 | 85.1  | 84.7  | 83.7  | 84.3   | 84.7  | 84.1  | 83.2  |
| 95-104                        | 91.6                                                 | 90.6  | 90.2  | 89.3  | 90.5   | 90.5  | 89.9  | 88.8  |
| 105-149                       | 99.5                                                 | 97.6  | 97.0  | 95.5  | 98.2   | 97.7  | 96.7  | 96.0  |
| Overall                       | 79.6                                                 | 80.2  | 79.0  | 77.1  | 76.5   | 78.4  | 77.3  | 75.6  |

\*Usual blood pressure in each baseline blood pressure group was estimated by  $(A-B) \times RDR + A$ , where A represents the overall age-specific mean blood pressure (Table S3), B is the given baseline blood pressure group mean and RDR is the age- and sex-specific regression dilution ratio (Table S4). For plots of incident chronic disease versus usual blood pressure at age 40-79 years, we calculated the weighted average of the age- and sex-specific usual blood pressure values, with weights equal to the inverse-variance of the age- and sex-specific hazard ratios.



**Table S6: Incidence of ischaemic heart disease, ischaemic stroke and intracerebral haemorrhage versus usual SBP, by age at risk and sex**

| Age at risk, years | Ischaemic heart disease |               |                       | Ischaemic stroke  |               |                       | Intracerebral haemorrhage |               |                       |
|--------------------|-------------------------|---------------|-----------------------|-------------------|---------------|-----------------------|---------------------------|---------------|-----------------------|
|                    | Mean age at event       | No. of events | Hazard ratio (95% CI) | Mean age at event | No. of events | Hazard ratio (95% CI) | Mean age at event         | No. of events | Hazard ratio (95% CI) |
| <b>Male</b>        |                         |               |                       |                   |               |                       |                           |               |                       |
| 40-49              | 46                      | 192           | 1.58 (1.40-1.78)      | 46                | 941           | 1.67 (1.58-1.76)      | 45                        | 297           | 2.18 (2.02-2.36)      |
| 50-59              | 55                      | 487           | 1.45 (1.35-1.55)      | 55                | 3058          | 1.48 (1.44-1.52)      | 55                        | 667           | 1.93 (1.84-2.03)      |
| 60-69              | 65                      | 774           | 1.32 (1.24-1.39)      | 65                | 4475          | 1.40 (1.37-1.43)      | 65                        | 1107          | 1.76 (1.69-1.84)      |
| 70-79              | 74                      | 1046          | 1.23 (1.17-1.30)      | 74                | 4757          | 1.22 (1.19-1.25)      | 74                        | 1124          | 1.45 (1.39-1.52)      |
| All                | 65                      | 2499          | 1.33 (1.29-1.37)      | 64                | 13231         | 1.38 (1.36-1.40)      | 64                        | 3195          | 1.74 (1.70-1.79)      |
| <b>Female</b>      |                         |               |                       |                   |               |                       |                           |               |                       |
| 40-49              | 46                      | 98            | 1.56 (1.37-1.79)      | 46                | 1131          | 1.51 (1.45-1.57)      | 46                        | 317           | 1.99 (1.88-2.11)      |
| 50-59              | 55                      | 303           | 1.36 (1.26-1.46)      | 55                | 4277          | 1.30 (1.27-1.33)      | 55                        | 736           | 1.79 (1.72-1.86)      |
| 60-69              | 65                      | 609           | 1.29 (1.22-1.37)      | 64                | 5841          | 1.26 (1.23-1.28)      | 64                        | 889           | 1.56 (1.49-1.62)      |
| 70-79              | 75                      | 941           | 1.25 (1.19-1.31)      | 74                | 4863          | 1.15 (1.12-1.17)      | 74                        | 874           | 1.34 (1.28-1.41)      |
| All                | 67                      | 1951          | 1.30 (1.26-1.34)      | 64                | 16112         | 1.25 (1.24-1.27)      | 63                        | 2816          | 1.63 (1.60-1.67)      |
| <b>Overall</b>     | 66                      | 4450          | 1.31 (1.28-1.34)      | 64                | 29343         | 1.30 (1.29-1.31)      | 64                        | 6011          | 1.68 (1.65-1.71)      |

Hazard ratios are adjusted for age at risk (5-year groups), sex (where appropriate), region, education, smoking, alcohol and BMI. Analyses in 489,125 participants at risk; exclusions as in Table 1.

**Figure S1: Incidence of vascular and non-vascular chronic disease versus usual SBP**

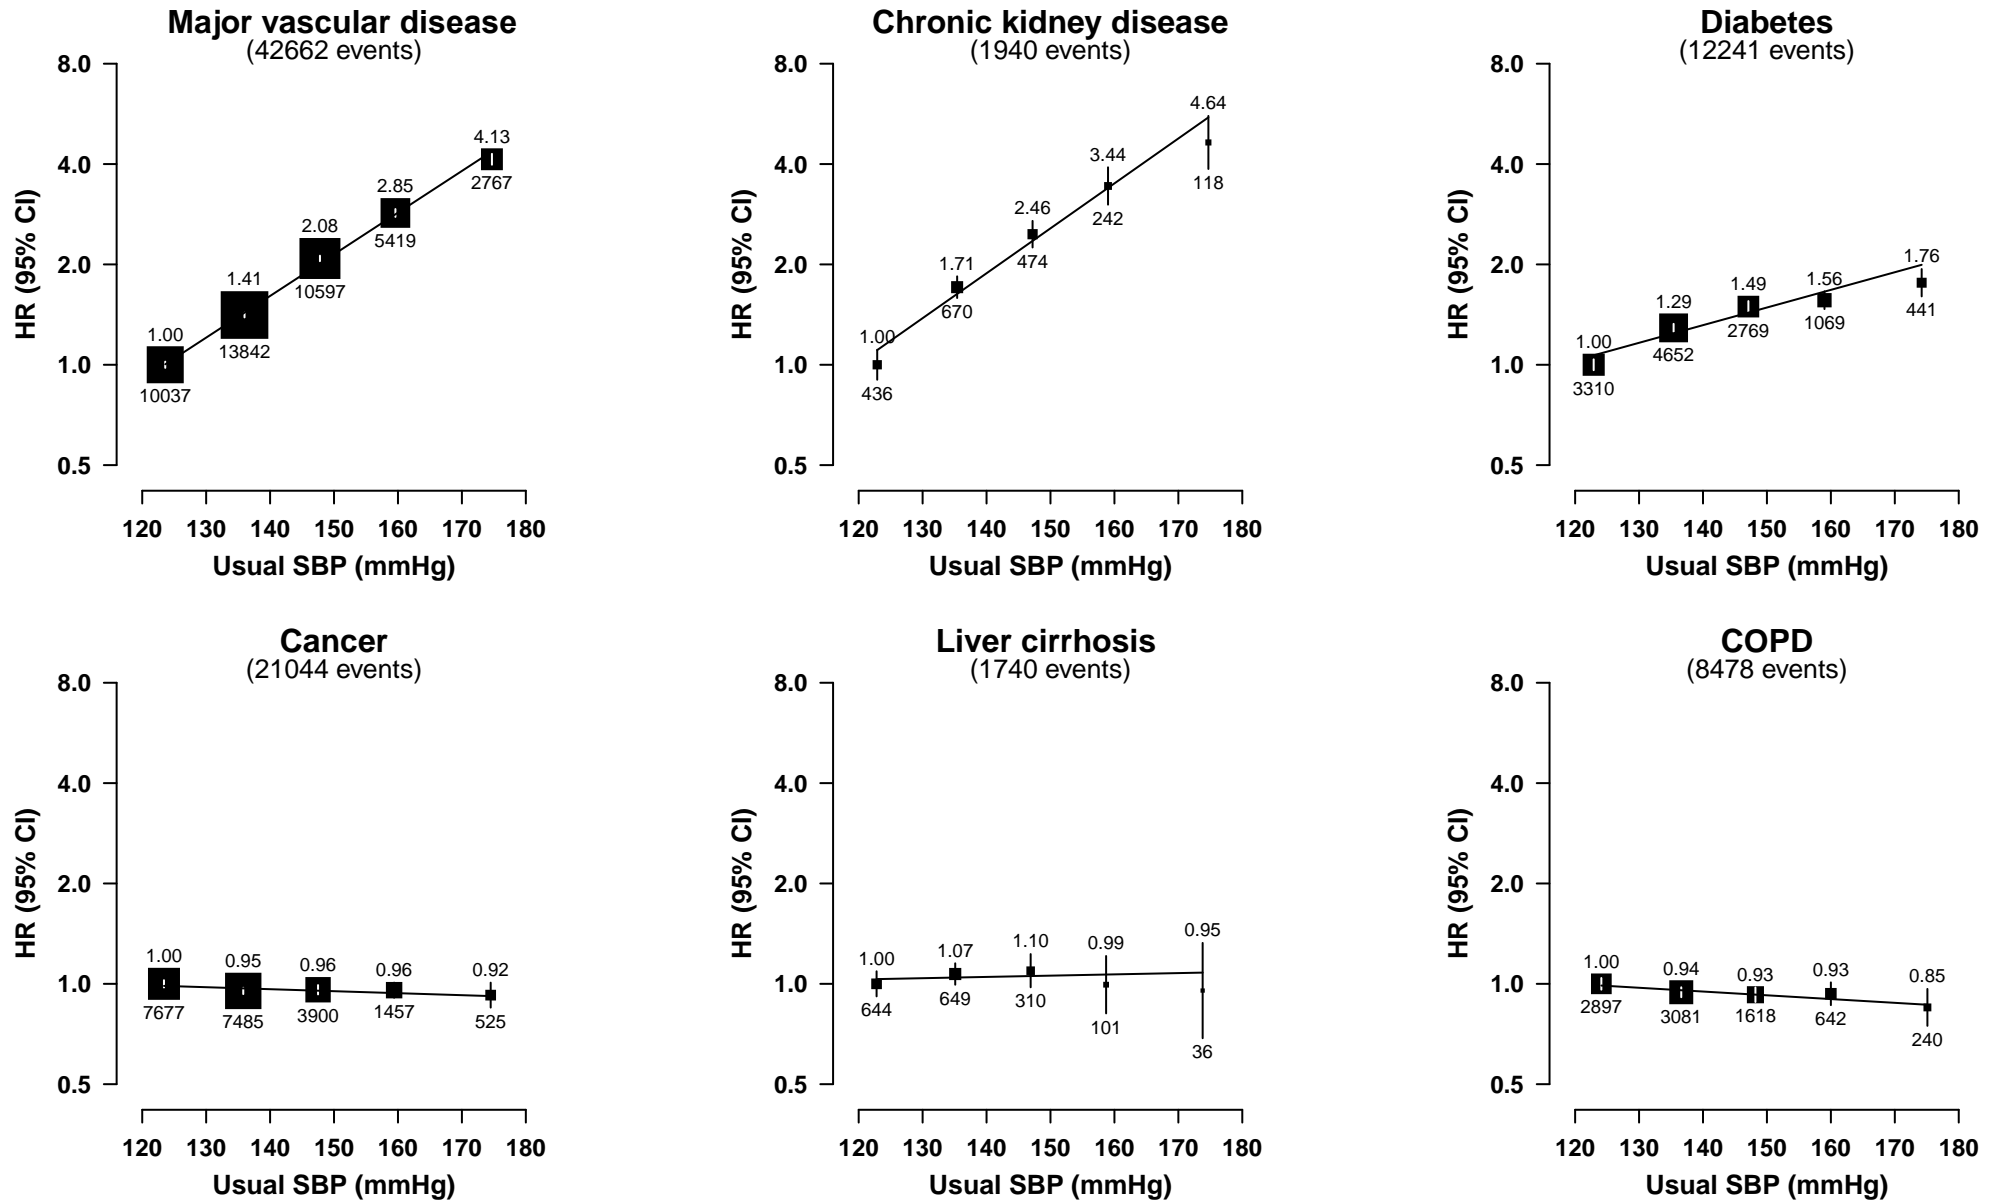

COPD=Chronic obstructive pulmonary disease. Hazard ratios (HR) at age 40–79 years, adjusted for age at risk (5–year groups), sex, region, education, smoking, alcohol and BMI. For each category, the area of each square is inversely proportional to the variance of the category-specific log risk, which also determines the confidence interval (CI). HR is shown above each square and numbers of events below. Exclusions as in Table 1; analyses of each non-vascular disease, further exclude participants with a prior diagnosis of the relevant disease at baseline (appendix p4).

**Figure S2: Mortality from Vascular and non-vascular chronic disease:  
hazard ratio for 10 mmHg higher usual SBP**

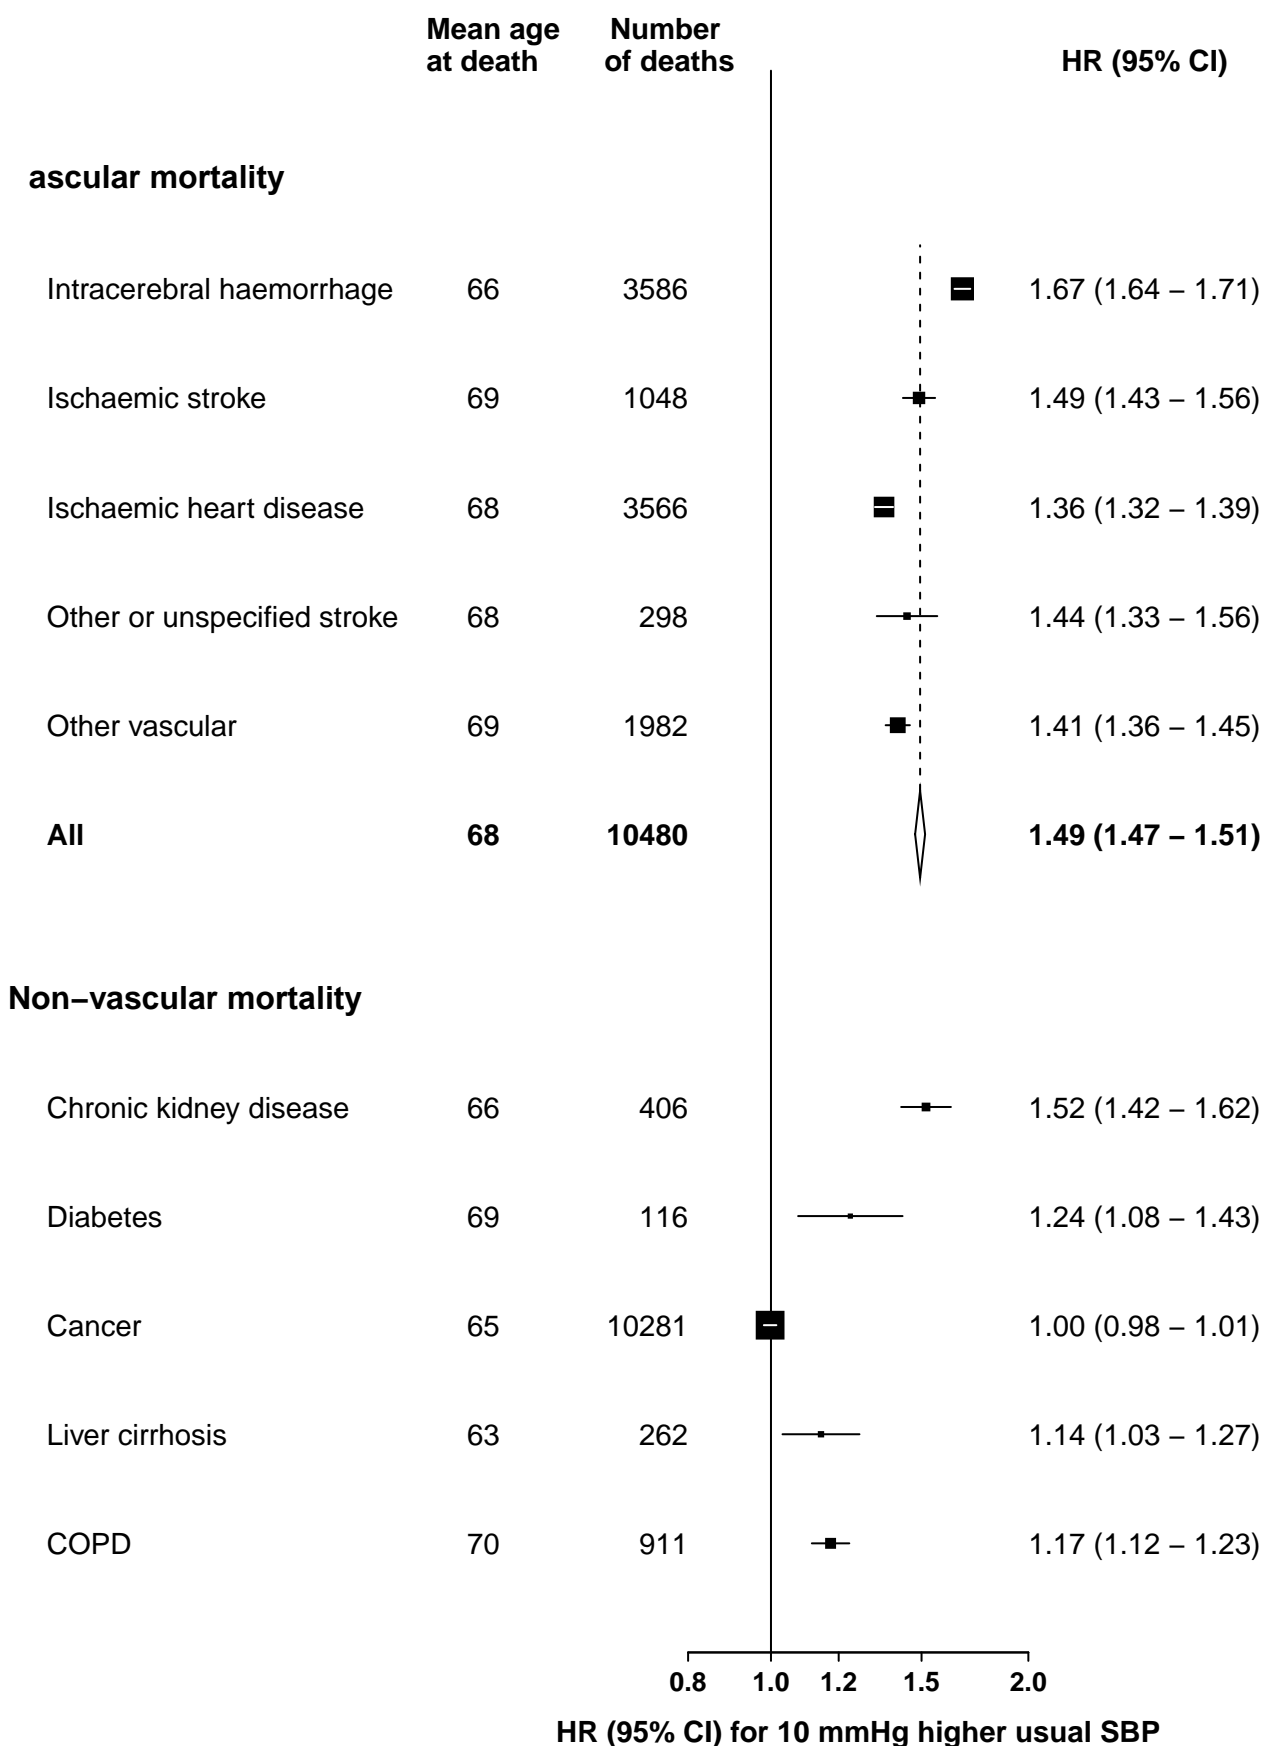

Hazard ratios (HR) at age 40–79 years, adjusted for age at risk (5-year groups), sex, region, education, smoking, alcohol and BMI. For each category, area of square is inversely proportional to the variance log hazard ratio, which also determines the confidence interval (CI). Exclusions as in Table 1; analyses of each non-vascular disease, further excluded participants with a prior diagnosis of the relevant disease at baseline. Deaths were identified from mortality registries, with the underlying cause of death obtained from the death certificate.

**Figure S3: Vascular deaths attributable to elevated SBP in China, 2015**

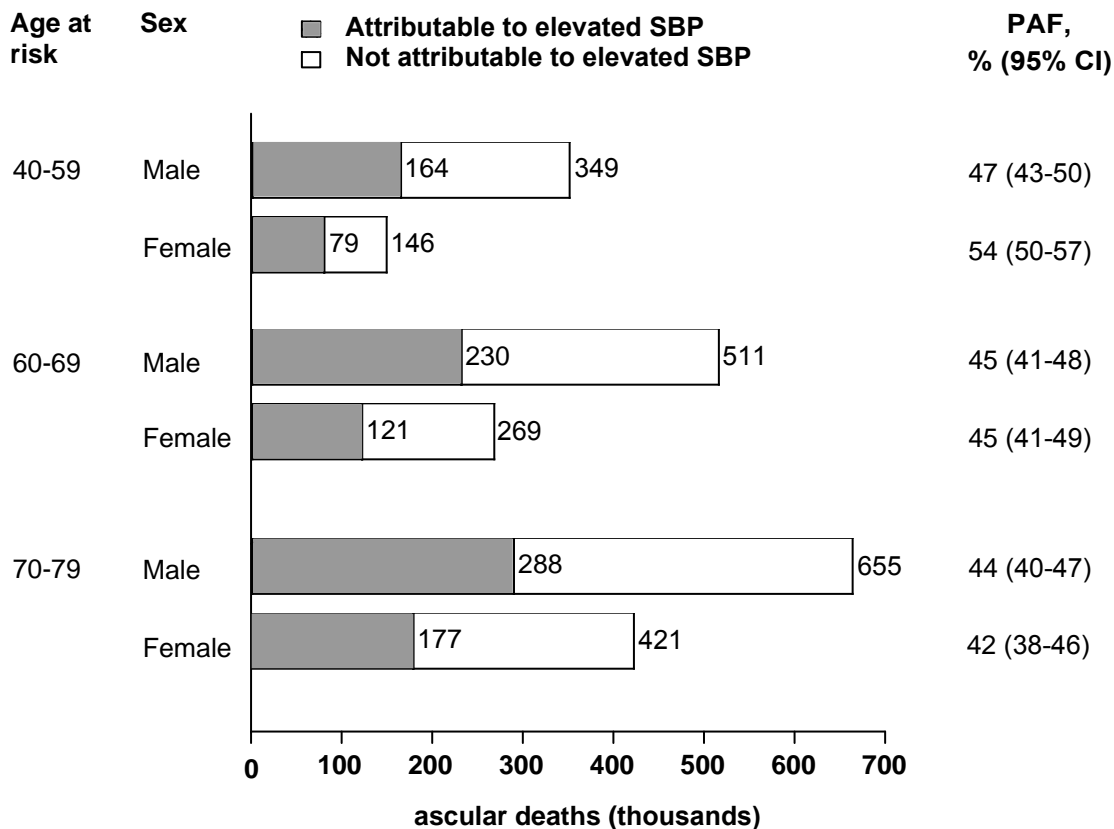

Population-attributable fractions (PAF) of elevated usual SBP (>120 mmHg) for vascular mortality were applied to the number of vascular deaths in China for 2015 (as estimated by the Global Burden of Disease Study 2015), to give the number of deaths attributable to elevated usual SBP for that year. At ages 40-79 years (both sexes combined), the overall PAF was 45% and the total number of deaths attributable to elevated SBP was 1.1 million.

**Table S7: Incidence of vascular and non-vascular chronic disease: hazard ratios for 10 mm Hg higher usual SBP, progressively adjusted for potential confounders**

|                               | Mean age<br>at event | Number of<br>events | Hazard ratio (95% CI) |                  |                   |
|-------------------------------|----------------------|---------------------|-----------------------|------------------|-------------------|
|                               |                      |                     | Model 1               | Model 2          | Model 3           |
| <b>Major vascular disease</b> |                      |                     |                       |                  |                   |
| Ischaemic heart disease       | 66                   | 4450                | 1.31(1.28-1.34)       | 1.31 (1.28-1.34) | 1.30 (1.27-1.33)  |
| Ischaemic stroke              | 64                   | 29343               | 1.33 (1.31-1.34)      | 1.30 (1.29-1.31) | 1.29 (1.28-1.31)  |
| Intracerebral haemorrhage     | 64                   | 6011                | 1.67 (1.65-1.70)      | 1.68 (1.65-1.71) | 1.68 (1.65-1.70)  |
| Other or unspecified stroke   | 63                   | 1572                | 1.30 (1.26-1.35)      | 1.29 (1.24-1.34) | 1.28 (1.23-1.33)  |
| Other vascular                | 67                   | 1286                | 1.32 (1.26-1.37)      | 1.34 (1.29-1.40) | 1.33 (1.27-1.38)  |
| All                           | 64                   | 42662               | 1.37 (1.36-1.38)      | 1.36 (1.35-1.37) | 1.35 (1.34-1.36)  |
| <b>Non-vascular disease</b>   |                      |                     |                       |                  |                   |
| Chronic kidney disease        | 61                   | 1940                | 1.41 (1.37-1.46)      | 1.40 (1.35-1.44) | 1.35 (1.31-1.40)* |
| Diabetes                      | 60                   | 12241               | 1.26 (1.25-1.28)      | 1.14 (1.12-1.15) | 1.14 (1.12-1.15)  |
| Cancer                        | 62                   | 21044               | 0.99 (0.98-1.00)      | 0.99 (0.98-1.01) | 0.99 (0.98-1.00)  |
| Liver cirrhosis               | 59                   | 1740                | 1.01 (0.97-1.05)      | 1.02 (0.98-1.06) | 1.01 (0.97-1.06)  |
| COPD                          | 65                   | 8478                | 0.96 (0.94-0.98)      | 0.98 (0.96-1.00) | 0.98 (0.96-1.00)  |

Exclusions as in Table 1; analyses of each non-vascular disease, further excluded participants with a prior diagnosis of the relevant disease at baseline.

**Model 1:** Adjusted for age, sex and region;

**Model 2:** Adjusted for age, sex, region, education, smoking, alcohol and BMI;

**Model 3:** Adjusted for age, sex, region, education, smoking, alcohol, BMI, physical activity, diabetes, frequency of fruit consumption, and frequency of vegetable consumption.

\*Not adjusting for diabetes: hazard ratio 1.39 (95% CI 1.34-1.43)

**Table S8: Incidence of vascular and non-vascular chronic disease: hazard ratios for 10 mm Hg higher usual SBP in urban and rural areas**

|                               | Urban areas       |                  |                       | Rural areas       |                  |                       |
|-------------------------------|-------------------|------------------|-----------------------|-------------------|------------------|-----------------------|
|                               | Mean age at event | Number of events | Hazard ratio (95% CI) | Mean age at event | Number of events | Hazard ratio (95% CI) |
| <b>Major vascular disease</b> |                   |                  |                       |                   |                  |                       |
| Ischaemic heart disease       | 66                | 1738             | 1.35 (1.30-1.40)      | 66                | 2712             | 1.28 (1.24-1.31)      |
| Ischaemic stroke              | 65                | 15427            | 1.22 (1.21-1.24)      | 63                | 13916            | 1.37 (1.36-1.39)      |
| Intracerebral haemorrhage     | 63                | 1409             | 1.71 (1.65-1.77)      | 64                | 4602             | 1.65 (1.62-1.68)      |
| Other or unspecified stroke   | 64                | 662              | 1.35 (1.27-1.43)      | 62                | 910              | 1.25 (1.19-1.31)      |
| Other vascular                | 69                | 605              | 1.34 (1.26-1.43)      | 68                | 681              | 1.32 (1.24-1.39)      |
| All                           | 65                | 19841            | 1.28 (1.26-1.29)      | 64                | 22821            | 1.41 (1.40-1.43)      |
| <b>Non-vascular disease</b>   |                   |                  |                       |                   |                  |                       |
| Chronic kidney disease        | 63                | 813              | 1.42 (1.35-1.50)      | 60                | 1127             | 1.38 (1.32-1.44)      |
| Diabetes                      | 60                | 5140             | 1.18 (1.15-1.21)      | 59                | 7101             | 1.11 (1.09-1.14)      |
| Cancer                        | 62                | 9694             | 1.01 (0.99-1.03)      | 62                | 11350            | 0.98 (0.96-0.99)      |
| Liver cirrhosis               | 60                | 689              | 1.04 (0.97-1.11)      | 59                | 1051             | 0.99 (0.94-1.05)      |
| COPD                          | 68                | 1763             | 0.95 (0.91-0.99)      | 64                | 6715             | 0.99 (0.97-1.01)      |

Hazard ratios are adjusted for age at risk (5-year groups), sex, area, education, smoking, alcohol and BMI. Exclusions as in Table 1; analyses of each non-vascular disease, further exclude participants with a prior diagnosis of the relevant disease at baseline.

**Table S9: Incidence of vascular and non-vascular chronic disease: hazard ratios for 10 mm Hg higher usual SBP, excluding the first 3 years of follow-up and excluding those taking blood pressure-lowering medication at baseline**

|                               | Excluding the first 3 years of follow-up |                  |                       | Excluding participants taking blood-pressure lowering medication at baseline |                  |                       |
|-------------------------------|------------------------------------------|------------------|-----------------------|------------------------------------------------------------------------------|------------------|-----------------------|
|                               | Mean age at event                        | Number of events | Hazard ratio (95% CI) | Mean age at event                                                            | Number of events | Hazard ratio (95% CI) |
| <b>Major vascular disease</b> |                                          |                  |                       |                                                                              |                  |                       |
| Ischaemic heart disease       | 67                                       | 2924             | 1.32 (1.29-1.36)      | 66                                                                           | 3992             | 1.31 (1.28-1.34)      |
| Ischaemic stroke              | 64                                       | 20606            | 1.28 (1.27-1.29)      | 64                                                                           | 26673            | 1.30 (1.28-1.31)      |
| Intracerebral haemorrhage     | 64                                       | 3579             | 1.69 (1.66-1.73)      | 63                                                                           | 5384             | 1.69 (1.66-1.72)      |
| Other or unspecified stroke   | 63                                       | 1001             | 1.24 (1.18-1.30)      | 62                                                                           | 1429             | 1.29 (1.24-1.34)      |
| Other vascular                | 69                                       | 856              | 1.35 (1.28-1.42)      | 67                                                                           | 1180             | 1.34 (1.28-1.40)      |
| All                           | 65                                       | 28966            | 1.34 (1.33-1.35)      | 64                                                                           | 38658            | 1.36 (1.35-1.37)      |
| <b>Non-vascular disease</b>   |                                          |                  |                       |                                                                              |                  |                       |
| Chronic kidney disease        | 62                                       | 1335             | 1.41 (1.35-1.46)      | 61                                                                           | 1735             | 1.38 (1.33-1.43)      |
| Diabetes                      | 60                                       | 8576             | 1.14 (1.12-1.16)      | 60                                                                           | 11416            | 1.13 (1.11-1.15)      |
| Cancer                        | 63                                       | 12976            | 1.01 (0.99-1.02)      | 62                                                                           | 20065            | 0.99 (0.98-1.01)      |
| Liver cirrhosis               | 60                                       | 1103             | 1.03 (0.97-1.08)      | 59                                                                           | 1684             | 1.03 (0.99-1.08)      |
| COPD                          | 66                                       | 5791             | 0.98 (0.96-1.00)      | 65                                                                           | 8066             | 0.97 (0.96-0.99)      |

Hazard ratios are adjusted for age at risk (5-year groups), sex, region, education, smoking, alcohol and BMI. Exclusions as in Table 1; analyses of each non-vascular disease, further excluded participants with a prior diagnosis of the relevant disease at baseline.

**Table S10: Incidence of chronic kidney disease and diabetes versus usual SBP, by age at risk and sex**

| Age at risk, years | Chronic kidney disease |               |                       | Diabetes          |               |                       |
|--------------------|------------------------|---------------|-----------------------|-------------------|---------------|-----------------------|
|                    | Mean age at event      | No. of events | Hazard ratio (95% CI) | Mean age at event | No. of events | Hazard ratio (95% CI) |
| <b>Male</b>        |                        |               |                       |                   |               |                       |
| 40-49              | 45                     | 112           | 1.94 (1.70 - 2.21)    | 45                | 824           | 1.14 (1.06 - 1.22)    |
| 50-59              | 55                     | 183           | 1.52 (1.36 - 1.70)    | 55                | 1436          | 1.07 (1.02 - 1.13)    |
| 60-69              | 64                     | 258           | 1.37 (1.24 - 1.51)    | 64                | 1516          | 1.08 (1.04 - 1.13)    |
| 70-79              | 74                     | 264           | 1.38 (1.25 - 1.52)    | 74                | 837           | 1.16 (1.10 - 1.24)    |
| All                | 63                     | 817           | 1.49 (1.41 - 1.57)    | 60                | 4613          | 1.10 (1.08 - 1.13)    |
| <b>Female</b>      |                        |               |                       |                   |               |                       |
| 40-49              | 45                     | 194           | 1.46 (1.31 - 1.62)    | 46                | 1069          | 1.18 (1.12 - 1.24)    |
| 50-59              | 55                     | 350           | 1.32 (1.22 - 1.41)    | 55                | 2686          | 1.14 (1.11 - 1.17)    |
| 60-69              | 64                     | 338           | 1.41 (1.31 - 1.51)    | 64                | 2602          | 1.17 (1.14 - 1.20)    |
| 70-79              | 74                     | 241           | 1.21 (1.10 - 1.33)    | 74                | 1271          | 1.11 (1.07 - 1.16)    |
| All                | 60                     | 1123          | 1.35 (1.29 - 1.40)    | 60                | 7628          | 1.15 (1.13 - 1.17)    |
| <b>Overall</b>     | 61                     | 1940          | 1.40 (1.35-1.44)      | 60                | 12241         | 1.14 (1.12-1.15)      |

Hazard ratios are adjusted for age at risk (5-year groups), sex (where appropriate), region, education, smoking, alcohol and BMI. Exclusions as in Table 1; analyses of each non-vascular disease, further excluded participants with a prior diagnosis of the relevant disease at baseline.



**Table S11: Incidence of chronic kidney disease and cancer versus usual SBP, by disease subtype**

|                                            | Mean age<br>at event | No. of<br>events | Hazard ratio (95% CI) |
|--------------------------------------------|----------------------|------------------|-----------------------|
| <b>Chronic kidney disease, by subtype*</b> |                      |                  |                       |
| Hypertensive renal disease                 | 60                   | 241              | 1.43 (1.31-1.57)      |
| Renal complications from diabetes          | 63                   | 529              | 1.34 (1.26-1.43)      |
| Other/unspecified chronic kidney disease   | 61                   | 1170             | 1.43 (1.37-1.49)      |
| All                                        | 61                   | 1940             | 1.40 (1.35-1.44)      |
| <b>Cancer, by site†</b>                    |                      |                  |                       |
| Lung                                       | 65                   | 3722             | 0.99 (0.97-1.02)      |
| Colorectal                                 | 63                   | 2102             | 0.98 (0.95-1.02)      |
| Liver                                      | 62                   | 1925             | 0.99 (0.96-1.03)      |
| Oesophagus                                 | 64                   | 1701             | 1.01 (0.97-1.05)      |
| Other/unspecified cancer                   | 61                   | 11594            | 1.00 (0.99-1.02)      |
| All                                        | 62                   | 21044            | 0.99 (0.98-1.01)      |

Hazard ratios are adjusted for age at risk (5-year groups), sex, region, education, smoking, alcohol and BMI. Exclusions as in Table 1; analyses of each non-vascular disease, further excluded participants with a prior diagnosis of the relevant disease at baseline.

\* ICD 10 codes for chronic kidney disease: hypertensive renal disease (I12, I13); renal complications from diabetes (E10.2, E11.2, E12.2, E13.2, E14.2); and other chronic kidney disease (N03, N18, N26, N27)

† ICD 10 codes for cancer: Oesophagus (C15); Colorectal (C18-C21); Liver (C22); Lung (C33-C34); other cancer (remainder of chapter C00-C97).

**Figure S4: Incidence of ischaemic heart disease, ischaemic stroke and intracerebral haemorrhage versus usual DBP**

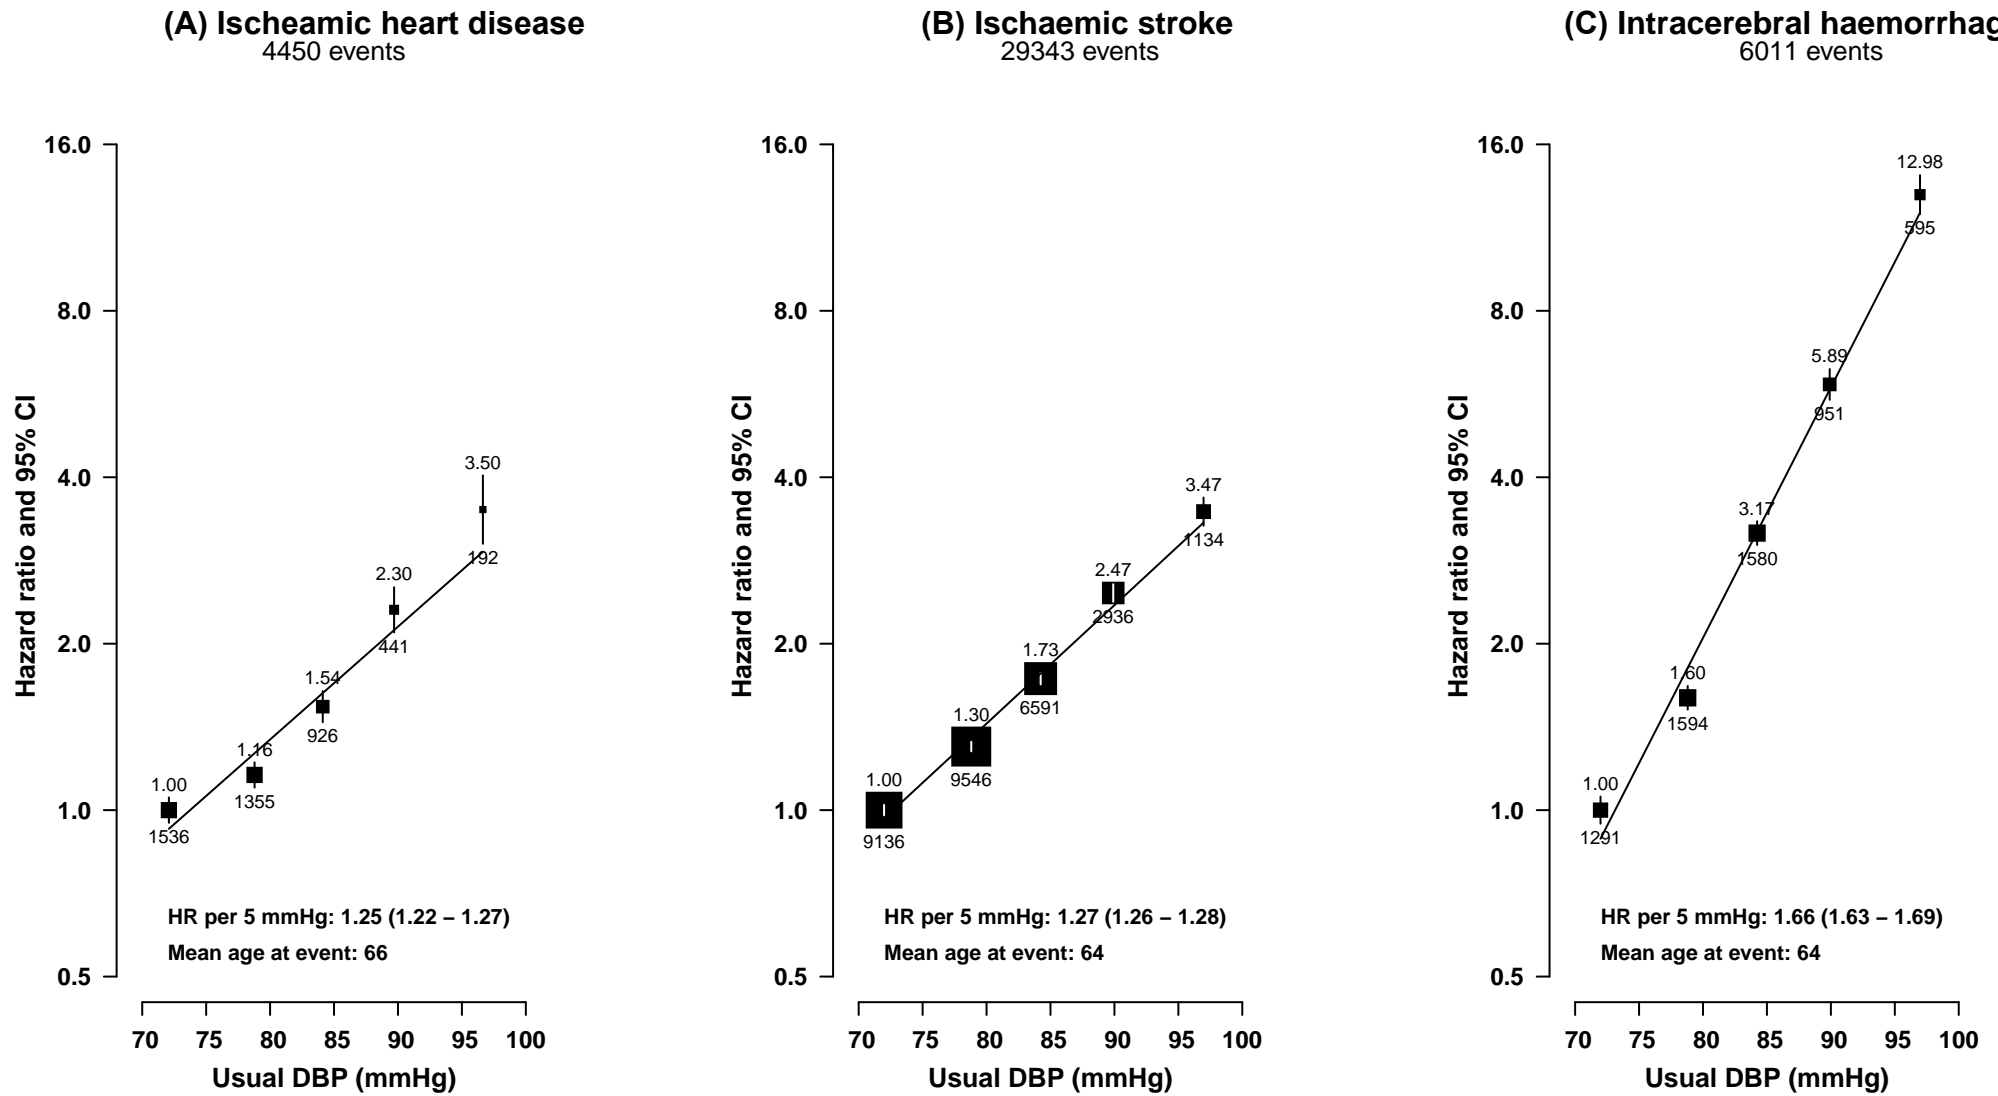

Hazard ratios (HR) at age 40-79 years, adjusted for age at risk (5-year groups), sex, region, education, smoking, alcohol and BMI. For each category, the area of each square is inversely proportional to the variance of the category-specific log risk, which also determines the confidence interval (CI). HR is shown above each square and numbers of events below. Exclusions as in Table 1.

**Table S12: Incidence of ischaemic heart disease, ischaemic stroke and intracerebral haemorrhage versus usual DBP, by age at risk and sex**

| Age at risk, years | Ischaemic heart disease |               |                       | Ischaemic stroke  |               |                       | Intracerebral haemorrhage |               |                       |
|--------------------|-------------------------|---------------|-----------------------|-------------------|---------------|-----------------------|---------------------------|---------------|-----------------------|
|                    | Mean age at event       | No. of events | Hazard ratio (95% CI) | Mean age at event | No. of events | Hazard ratio (95% CI) | Mean age at event         | No. of events | Hazard ratio (95% CI) |
| <b>Male</b>        |                         |               |                       |                   |               |                       |                           |               |                       |
| 40-49              | 46                      | 192           | 1.43 (1.31-1.57)      | 46                | 941           | 1.49 (1.43-1.55)      | 45                        | 297           | 1.88 (1.76-2.00)      |
| 50-59              | 55                      | 487           | 1.35 (1.27-1.44)      | 55                | 3058          | 1.42 (1.38-1.46)      | 55                        | 667           | 1.89 (1.80-1.98)      |
| 60-69              | 65                      | 774           | 1.23 (1.16-1.29)      | 65                | 4475          | 1.33 (1.30-1.36)      | 65                        | 1107          | 1.68 (1.61-1.74)      |
| 70-79              | 74                      | 1046          | 1.16 (1.11-1.22)      | 74                | 4757          | 1.16 (1.14-1.19)      | 74                        | 1124          | 1.44 (1.38-1.51)      |
| All                | 65                      | 2499          | 1.25 (1.21-1.28)      | 64                | 13231         | 1.31 (1.29-1.33)      | 64                        | 3195          | 1.67 (1.63-1.71)      |
| <b>Female</b>      |                         |               |                       |                   |               |                       |                           |               |                       |
| 40-49              | 46                      | 98            | 1.50 (1.32-1.70)      | 46                | 1131          | 1.44 (1.38-1.49)      | 46                        | 317           | 1.90 (1.79-2.01)      |
| 50-59              | 55                      | 303           | 1.36 (1.25-1.47)      | 55                | 4277          | 1.27 (1.24-1.30)      | 55                        | 736           | 1.82 (1.74-1.90)      |
| 60-69              | 65                      | 609           | 1.23 (1.16-1.31)      | 64                | 5841          | 1.22 (1.19-1.24)      | 64                        | 889           | 1.64 (1.57-1.71)      |
| 70-79              | 75                      | 941           | 1.18 (1.12-1.24)      | 74                | 4863          | 1.15 (1.12-1.17)      | 74                        | 874           | 1.33 (1.27-1.40)      |
| All                | 67                      | 1951          | 1.25 (1.21-1.29)      | 64                | 16112         | 1.23 (1.22-1.25)      | 63                        | 2816          | 1.65 (1.61-1.69)      |
| <b>Overall</b>     | 66                      | 4450          | 1.25 (1.22-1.27)      | 64                | 29343         | 1.27 (1.26-1.28)      | 64                        | 6011          | 1.66 (1.63-1.69)      |

Hazard ratios are adjusted for age at risk (5-year groups), sex (where appropriate), region, education, smoking, alcohol and BMI. Exclusions as in Table 1.

**Figure S5: Incidence of vascular and non-vascular chronic disease:  
hazard ratio for 5 mmHg higher usual DBP**

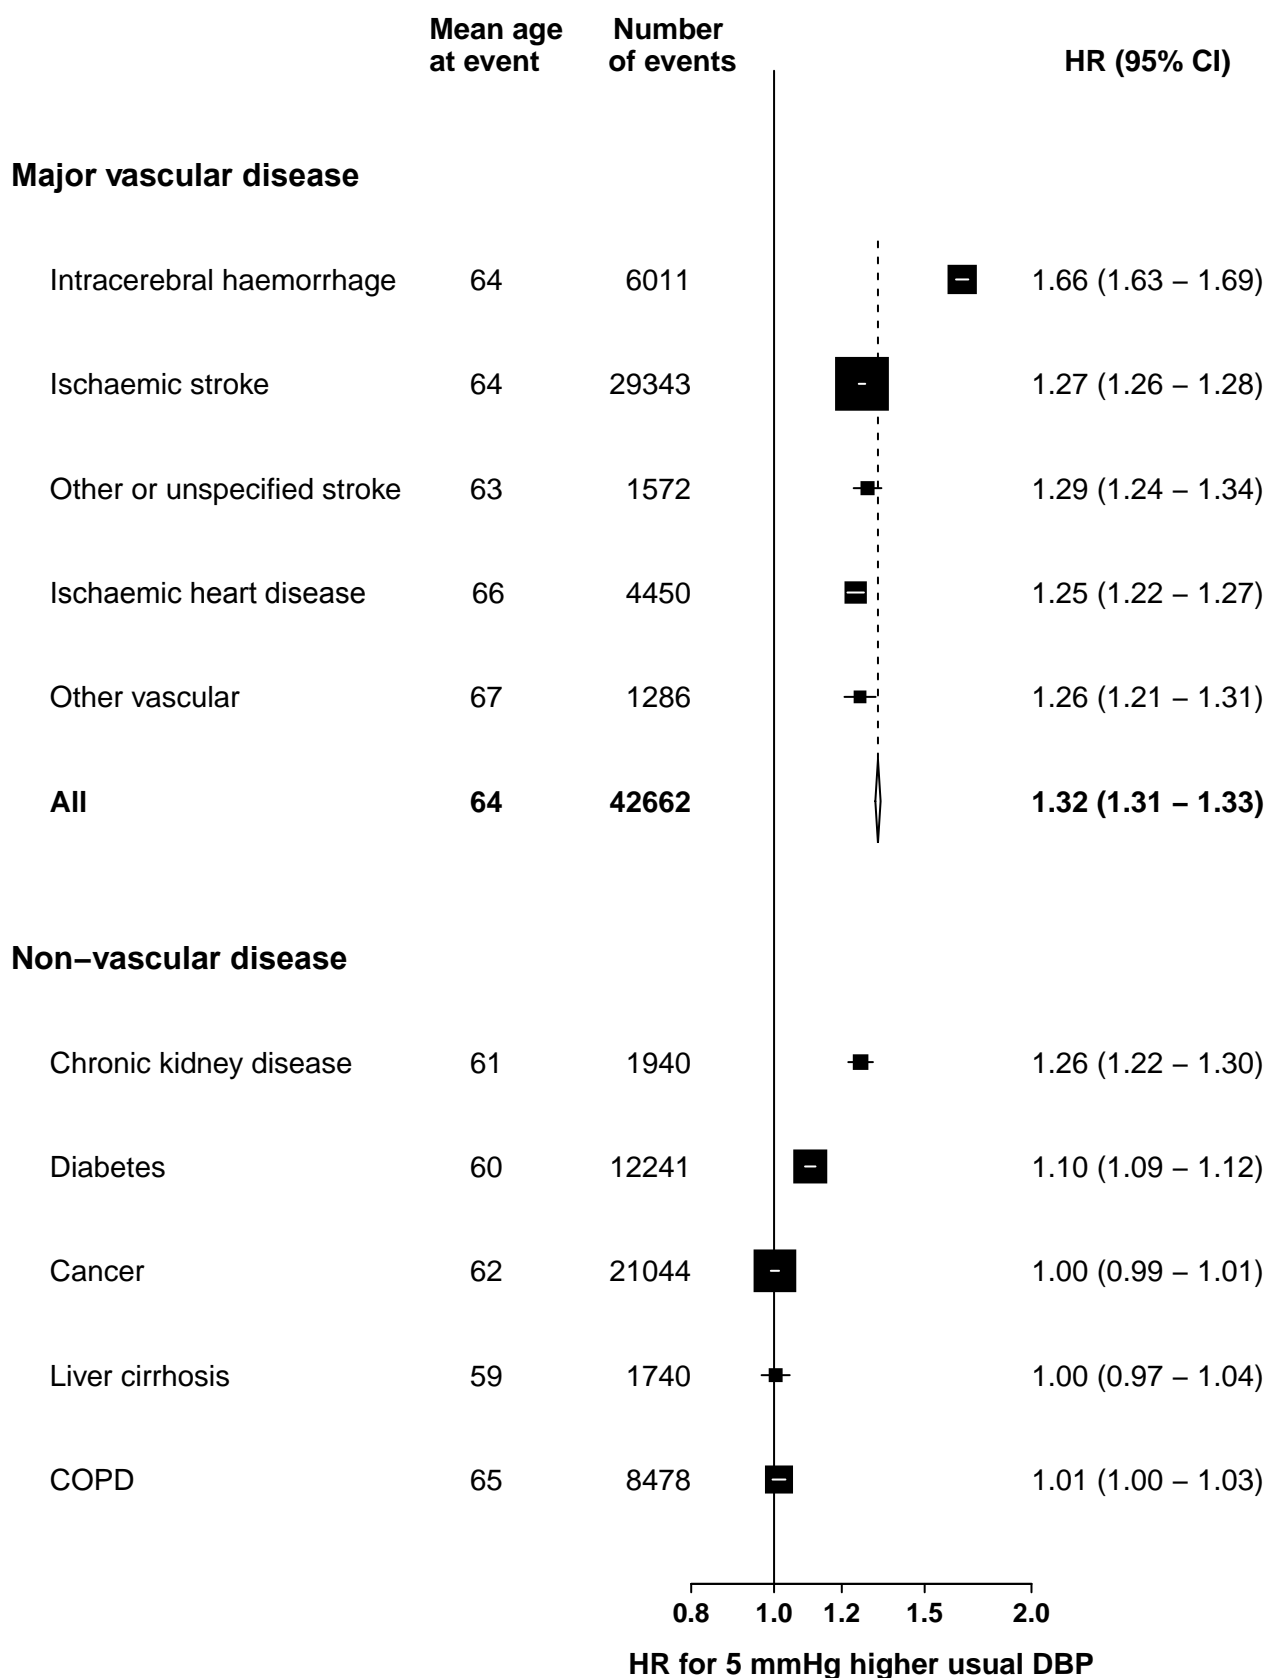

Hazard ratios (HR) at age 40–79 years, adjusted for age at risk (5-year groups), sex, region, education, smoking, alcohol and BMI. For each category, area of square is inversely proportional to the variance log hazard ratio, which also determines the confidence interval (CI). Exclusions as in Table 1; analyses of each non-vascular disease, further excluded participants with a prior diagnosis of the relevant disease at baseline.

**Figure S6: Incidence of vascular and non-vascular chronic disease versus usual DBP**

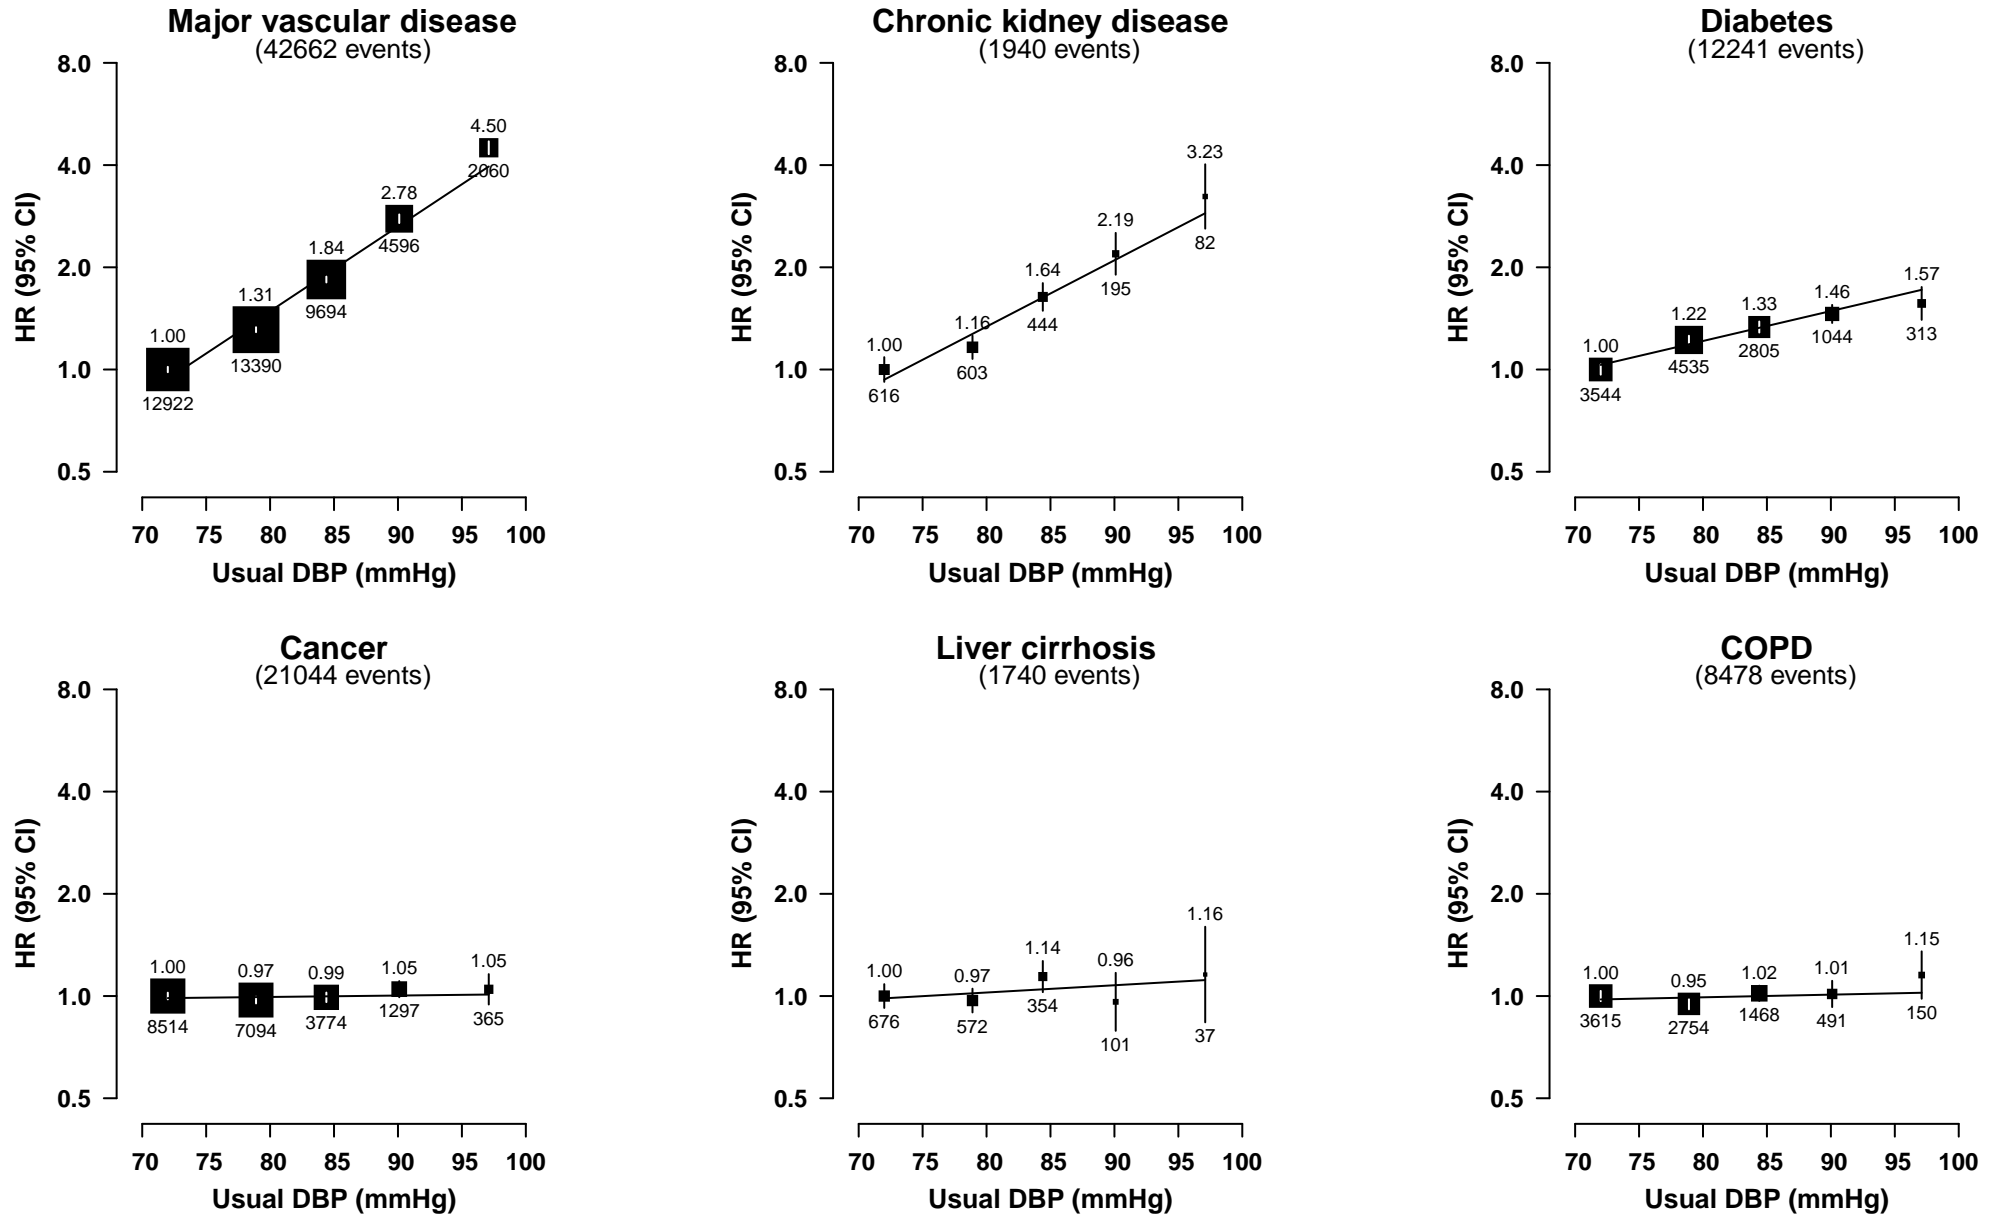

Hazard ratios (HR) at age 40–79 years, adjusted for age at risk (5-year groups), sex, region, education, smoking, alcohol and BMI. For each category, the area of each square is inversely proportional to the variance of the category-specific log risk, which also determines the confidence interval (CI). HR is shown above each square and numbers of events below. Exclusions as in Table 1; analyses of each non-vascular disease, further excluded participants with a prior diagnosis of the relevant disease at baseline.

## China Kadoorie Biobank collaborative group and members

**International Steering Committee:** Junshi Chen, Zhengming Chen (PI), Robert Clarke, Rory Collins, Yu Guo, Liming Li (PI), Jun Lv, Richard Peto, Robin Walters.

**International Co-ordinating Centre, Oxford:** Daniel Avery, Derrick Bennett, Ruth Boxall, Fiona Bragg, Yumei Chang, Yiping Chen, Zhengming Chen, Robert Clarke, Huaidong Du, Simon Gilbert, Alex Hacker, Michael Holmes, Andri Iona, Christiana Kartsonaki, Rene Kerosi, Om Kurmi, Sarah Lewington, Garry Lancaster, Kuang Lin, John McDonnell, Iona Millwood, Qunhua Nie, Jayakrishnan Radhakrishnan, Paul Ryder, Sam Sansome, Dan Schmidt, Paul Sherliker, Rajani Sohoni, Becky Stevens, Iain Turnbull, Robin Walters, Jenny Wang, Lin Wang, Neil Wright, Ling Yang, Xiaoming Yang.

**National Co-ordinating Centre, Beijing:** Zheng Bian, Ge Chen, Yu Guo, Xiao Han, Can Hou, Jun Lv, Pei Pei, Shuzhen Qu, Yunlong Tan, Canqing Yu.

**10 Regional Co-ordinating Centres:** **Qingdao** Qingdao CDC: Zengchang Pang, Ruqin Gao, Shaojie Wang, Yongmei Liu, Ranran Du, Yajing Zang, Liang Cheng, Xiaocao Tian, Hua Zhang. Licang CDC: Silu Lv, Junzheng Wang, Wei Hou. **Heilongjiang** Provincial CDC: Jiyuan Yin, Ge Jiang, Xue Zhou. Nangang CDC: Liqiu Yang, Hui He, Bo Yu, Yanjie Li, Huaiyi Mu, Qinai Xu, Meiling Dou, Jiaojiao Ren. **Hainan** Provincial CDC: Shanqing Wang, Ximin Hu, Hongmei Wang, Jinyan Chen, Yan Fu, Zhenwang Fu, Xiaohuan Wang. Meilan CDC: Min Weng, Xiangyang Zheng, Yilei Li, Huimei Li, Yanjun Wang. **Jiangsu** Provincial CDC: Ming Wu, Jinyi Zhou, Ran Tao, Jie Yang. Suzhou CDC: Chuanming Ni, Jun Zhang, Yihe Hu, Yan Lu, , Liangcai Ma, Aiyu Tang, Shuo Zhang, Jianrong Jin, Jingchao Liu. **Guangxi** Provincial CDC: Zhenzhu Tang, Naying Chen, Ying Huang. Liuzhou CDC: Mingqiang Li, Jinhuai Meng, Rong Pan, Qilian Jiang, Weiyuan Zhang, Yun Liu, Liuping Wei, Liyuan Zhou, Ningyu Chen, Hairong Guan. **Sichuan** Provincial CDC: Xianping Wu, Ningmei Zhang, Xiaofang Chen, Xuefeng Tang. Pengzhou CDC: Guojin Luo, Jianguo Li, Xiaofang Chen, Xunfu Zhong, Jiaqiu Liu, Qiang Sun. **Gansu** Provincial CDC: Pengfei Ge, Xiaolan Ren, Caixia Dong. Maiji CDC: Hui Zhang, Enke Mao, Xiaoping Wang, Tao Wang, Xi Zhang. **Henan** Provincial CDC: Ding Zhang, Gang Zhou, Shixian Feng, Liang Chang, Lei Fan. Huixian CDC: Yulian Gao, Tianyou He, Huarong Sun, Pan He, Chen Hu, Qiannan Lv, Xukui Zhang. **Zhejiang** Provincial CDC: Min Yu, Ruying Hu, Hao Wang. Tongxiang CDC: Yijian Qian, Chunmei Wang, Kaixue Xie, Lingli Chen, Yidan Zhang, Dongxia Pan. **Hunan** Provincial CDC: Yuelong Huang, Biyun Chen, Li Yin, Donghui Jin, Huilin Liu, Zhongxi Fu, Qiaohua Xu. Liuyang CDC: Xin Xu, Hao Zhang, Youping Xiong, Huajun Long, Xianzhi Li, Libo Zhang, Zhe Qiu.
